# Supplementary material for: FLN-1/Filamin is required to anchor the actomyosin cytoskeleton and for global organization of sub-cellular organelles in a contractile tissue
Source: bioRxiv or medRxiv preprint supplement (doi:10.1101/2020.07.03.186965), 2020-07-04

**A** **Supp. Fig. 1**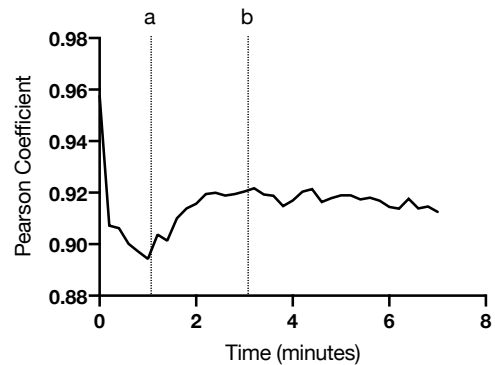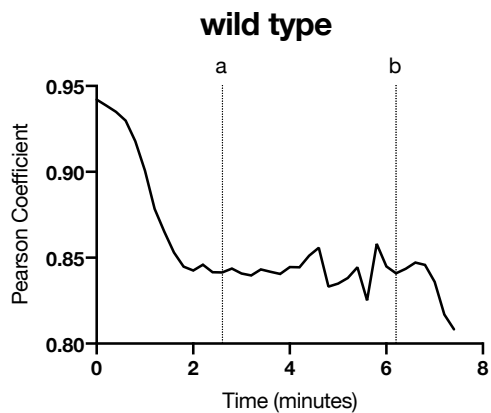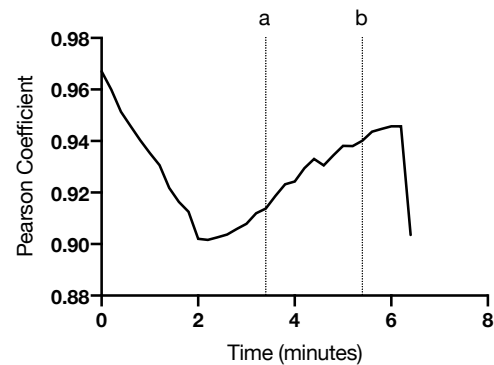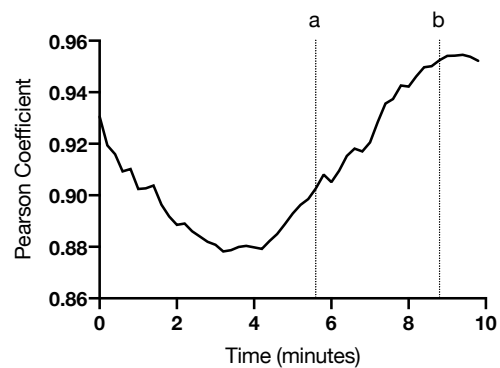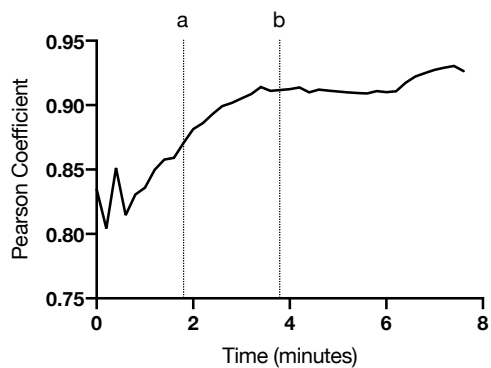**B**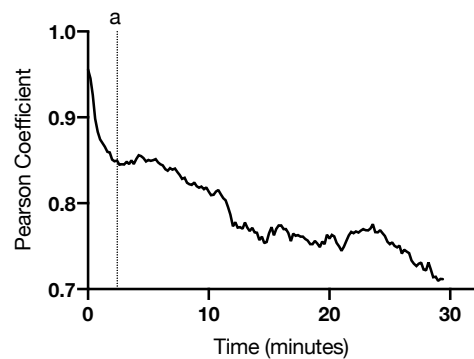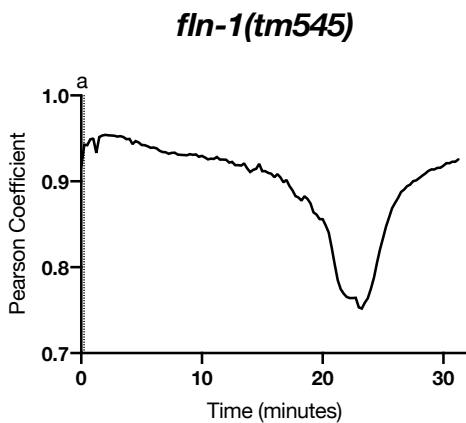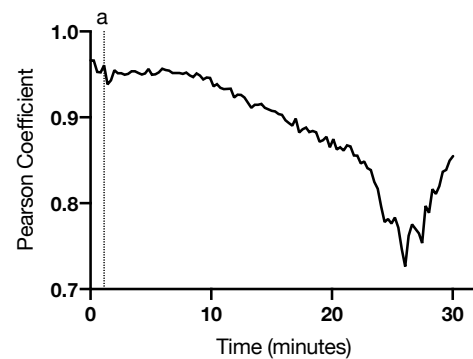

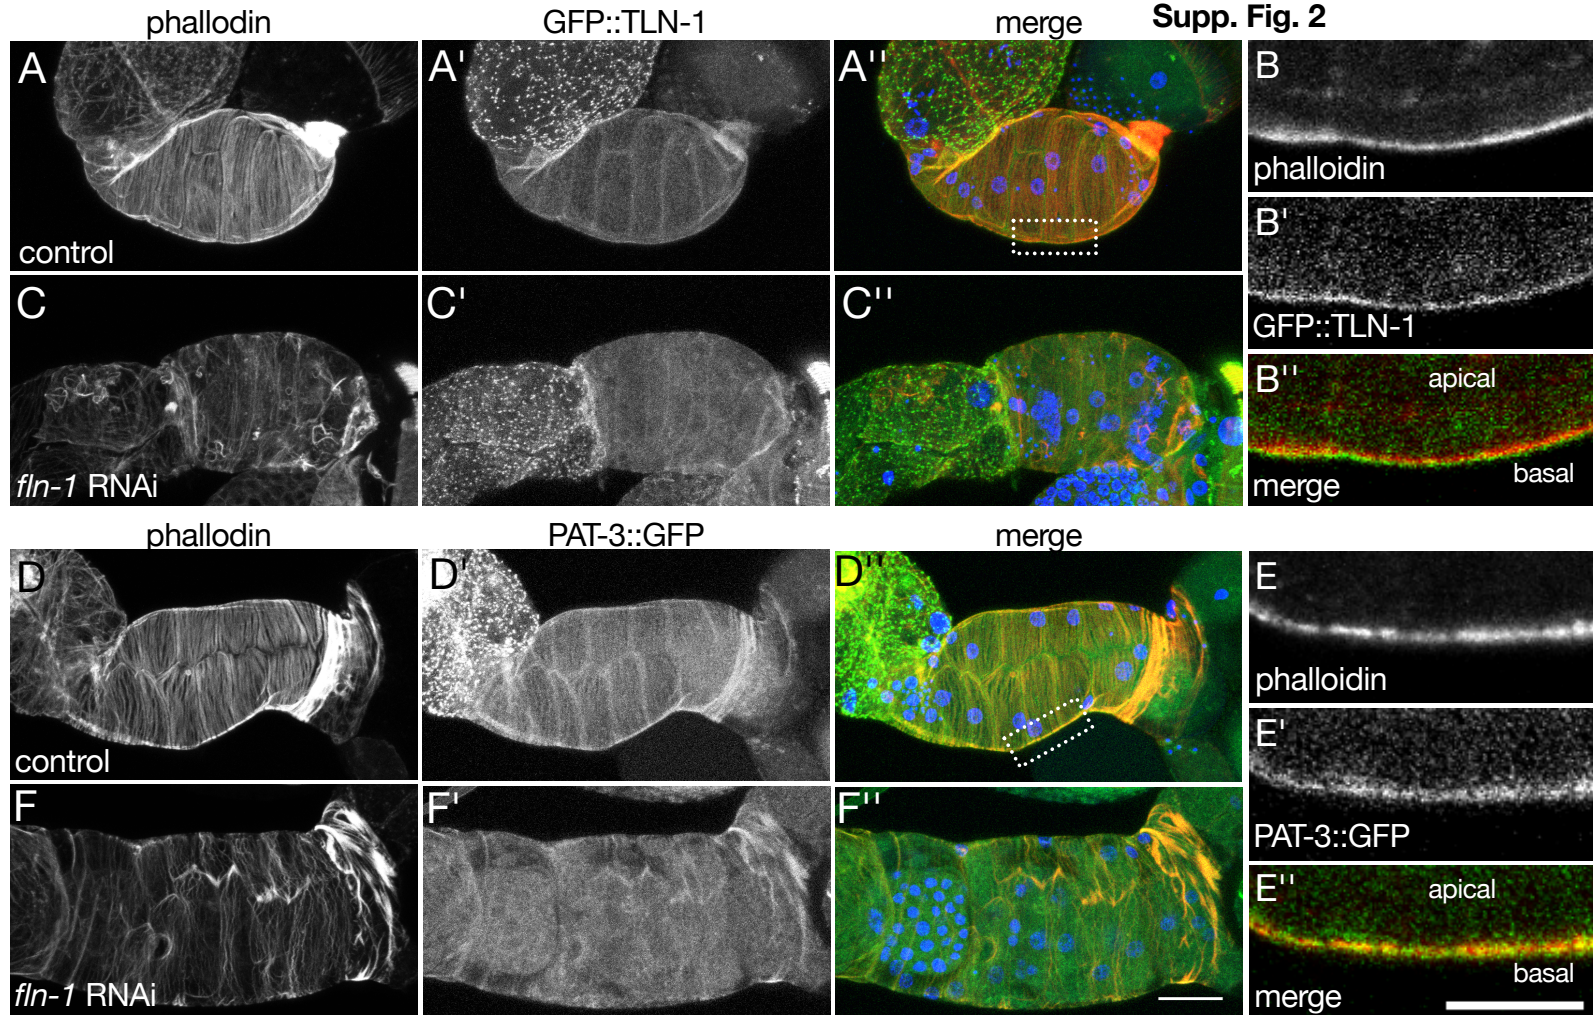

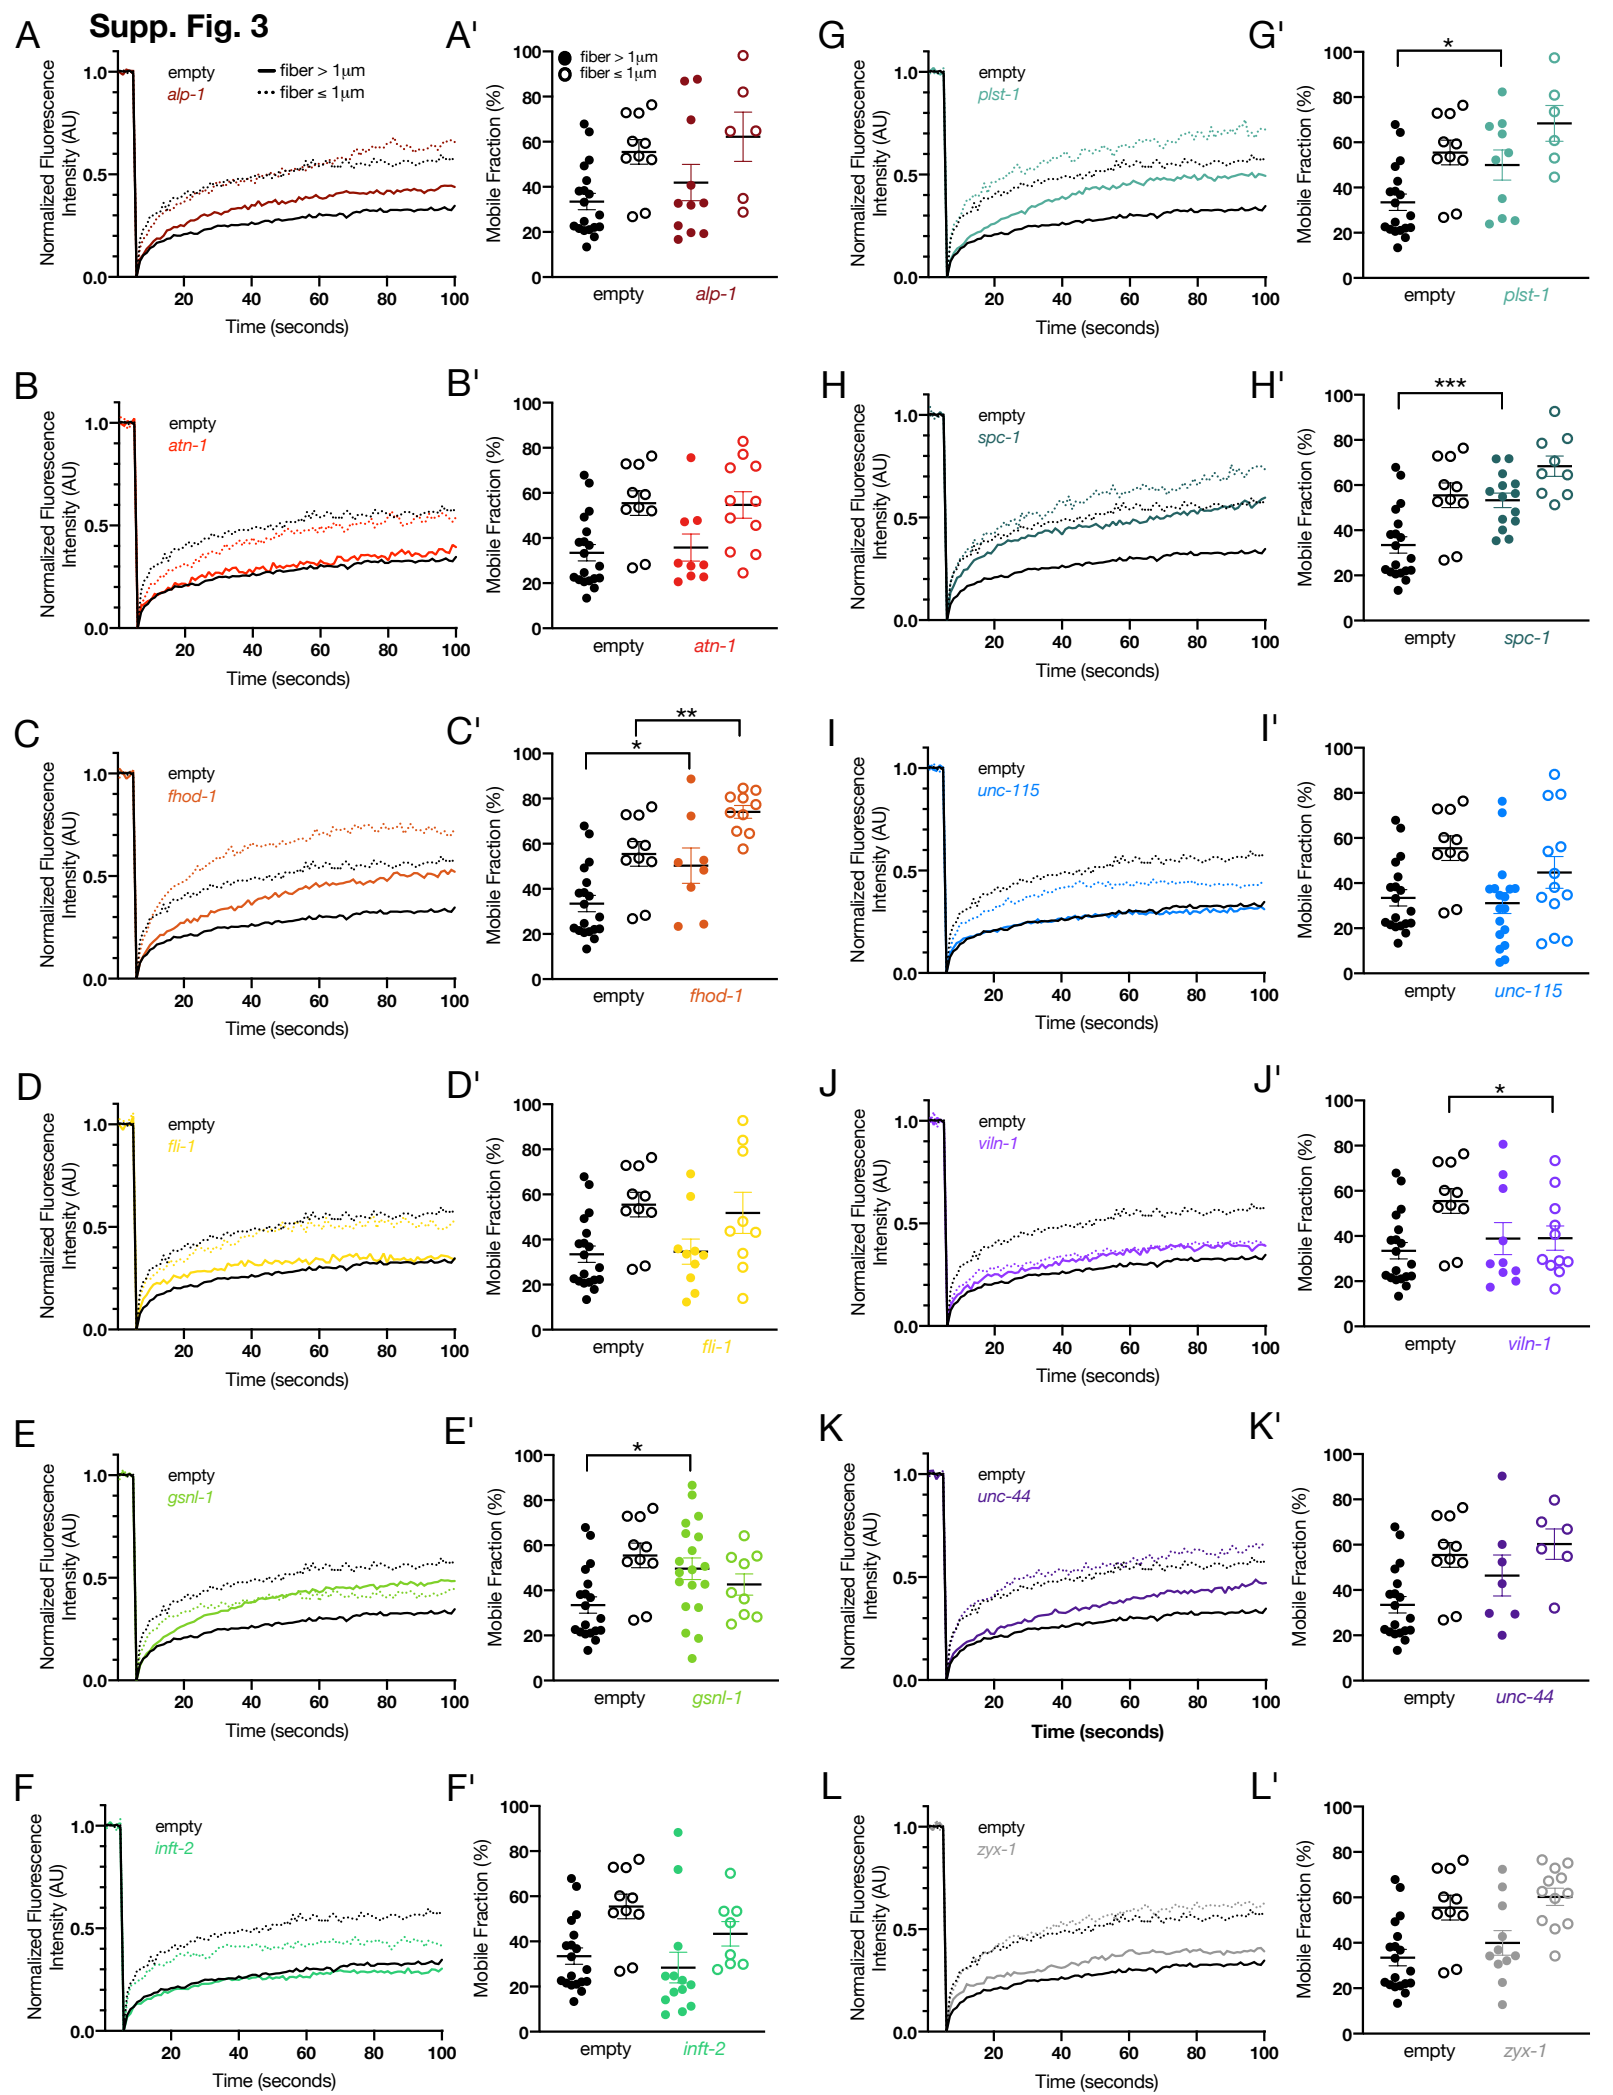

Supplement: Supplementary file [file media-1.pdf]
